# Supplementary material
Source: MDPI journal article supplement (https://www.mdpi.com/2077-0472/10/9/417)
Supplement: s1 [file s1]

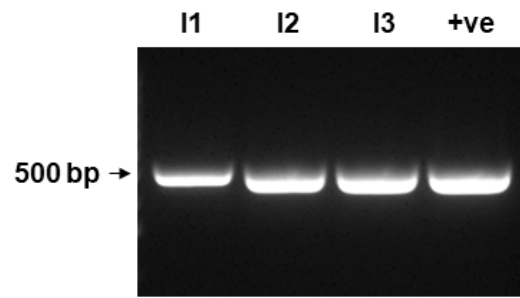

**Figure S1.** PCR amplification using Ptr specific primers PtrUnique\_F2/R2 confirming the fungal colonies with atypical morphology as Ptr. I1, I2 and I3 represent PCR products of three different colonies with similar atypical morphology. DNA of the isolate M4 was used as a positive control for the PCR amplification (+ve).
